# Supplementary material for: Neutrophile-to-Lymphocyte Ratio (NLR) Identifies Patients with Coronavirus Infectious Disease 2019 (COVID-19) at High Risk for Deterioration and Mortality—A Retrospective, Monocentric Cohort Study
Source: MDPI journal article supplement (doi:10.3390/diagnostics12051109), 2022-04-28

**Table S1.** Definitions of clinical characteristics collected from patients hospitalized due to COVID-19.

| Variable                                           | Definition                                                                                                                                                                                                                                                                                                                                                                                                                                                                                                                                                                                                         | Unit                    |
|----------------------------------------------------|--------------------------------------------------------------------------------------------------------------------------------------------------------------------------------------------------------------------------------------------------------------------------------------------------------------------------------------------------------------------------------------------------------------------------------------------------------------------------------------------------------------------------------------------------------------------------------------------------------------------|-------------------------|
| <b>Demographics</b>                                |                                                                                                                                                                                                                                                                                                                                                                                                                                                                                                                                                                                                                    |                         |
| Gender                                             | male or female                                                                                                                                                                                                                                                                                                                                                                                                                                                                                                                                                                                                     |                         |
| Age                                                |                                                                                                                                                                                                                                                                                                                                                                                                                                                                                                                                                                                                                    | years                   |
| <b>Symptoms</b>                                    |                                                                                                                                                                                                                                                                                                                                                                                                                                                                                                                                                                                                                    |                         |
| Time between onset of symptoms and hospitalization | indicated as reported by the patient upon admission                                                                                                                                                                                                                                                                                                                                                                                                                                                                                                                                                                | days                    |
| Cough                                              |                                                                                                                                                                                                                                                                                                                                                                                                                                                                                                                                                                                                                    |                         |
| Fever                                              | body temperature >38°C                                                                                                                                                                                                                                                                                                                                                                                                                                                                                                                                                                                             | °C                      |
| Headache                                           |                                                                                                                                                                                                                                                                                                                                                                                                                                                                                                                                                                                                                    |                         |
| Chest pain                                         |                                                                                                                                                                                                                                                                                                                                                                                                                                                                                                                                                                                                                    |                         |
| Dyspnea                                            |                                                                                                                                                                                                                                                                                                                                                                                                                                                                                                                                                                                                                    |                         |
| Myalgia, arthralgia, malaise                       |                                                                                                                                                                                                                                                                                                                                                                                                                                                                                                                                                                                                                    |                         |
| Nasal congestion                                   |                                                                                                                                                                                                                                                                                                                                                                                                                                                                                                                                                                                                                    |                         |
| Gastrointestinal symptoms                          |                                                                                                                                                                                                                                                                                                                                                                                                                                                                                                                                                                                                                    |                         |
| Sore throat                                        |                                                                                                                                                                                                                                                                                                                                                                                                                                                                                                                                                                                                                    |                         |
| Anosmia                                            |                                                                                                                                                                                                                                                                                                                                                                                                                                                                                                                                                                                                                    |                         |
| <b>Vital signs</b>                                 |                                                                                                                                                                                                                                                                                                                                                                                                                                                                                                                                                                                                                    |                         |
| Systolic blood pressure                            | as documented upon hospital admission                                                                                                                                                                                                                                                                                                                                                                                                                                                                                                                                                                              | mmHg                    |
| Diastolic blood pressure                           |                                                                                                                                                                                                                                                                                                                                                                                                                                                                                                                                                                                                                    | mmHg                    |
| Heart rate                                         |                                                                                                                                                                                                                                                                                                                                                                                                                                                                                                                                                                                                                    | /min.                   |
| Oxygen saturation without supplemental oxygen      | oxygen saturation under room air without administration of supplemental oxygen                                                                                                                                                                                                                                                                                                                                                                                                                                                                                                                                     | %                       |
| Respiratory rate                                   |                                                                                                                                                                                                                                                                                                                                                                                                                                                                                                                                                                                                                    | /min.                   |
| Temperature                                        | body temperature measured by ear thermometer                                                                                                                                                                                                                                                                                                                                                                                                                                                                                                                                                                       | °C                      |
| GCS                                                | Glasgow coma scale indicating patients' consciousness, calculated from sum of the following points:<br>ocular response (1 = does not open eyes, 2 = opens eyes in response to pain, 3 = opens eyes in response to voice, 4 = opens eyes spontaneously)<br>oral response (1 = makes no sounds, 2 = makes sounds, 3 = words, 4 = confused, disoriented, 5 = oriented, converses normally)<br>motoric response (1 = makes no movements, 2 = extension to painful stimuli, 3 = abnormal flexion to painful stimuli, 4 = flexion / withdrawal to painful stimuli, 5 = localizes to painful stimuli, 6 = obeys commands) |                         |
| <b>Comorbidities</b>                               |                                                                                                                                                                                                                                                                                                                                                                                                                                                                                                                                                                                                                    |                         |
| Arterial hypertension                              | as documented in patients' personal history or diagnosed during hospital stay                                                                                                                                                                                                                                                                                                                                                                                                                                                                                                                                      |                         |
| Diabetes mellitus                                  | systolic blood pressure $\geq 140$ mmHg or a diastolic blood pressure $\geq 90$ mmHg                                                                                                                                                                                                                                                                                                                                                                                                                                                                                                                               |                         |
| Cardiovascular disease                             | Hemoglobin A1c (HbA1c) $\geq 6.5\%$ or fasting glucose $\geq 7.0$ mmol/l or oral glucose tolerance test $\geq 11.1$ mmol/l                                                                                                                                                                                                                                                                                                                                                                                                                                                                                         |                         |
| Chronic pulmonary disease                          | presence of coronary artery disease, occlusive peripheral artery disease, cerebrovascular disease (transient ischemic attack or stroke) and chronic heart failure                                                                                                                                                                                                                                                                                                                                                                                                                                                  |                         |
| Malignant disease                                  | Chronic obstructive pulmonary disease (COPD), pulmonary fibrosis, obstructive sleep apnea syndrome (OSAS), bronchial asthma                                                                                                                                                                                                                                                                                                                                                                                                                                                                                        |                         |
| eGFR <30 ml/min                                    | any current or preexisting hematologic or solid malignancy                                                                                                                                                                                                                                                                                                                                                                                                                                                                                                                                                         |                         |
| Obesity                                            | estimated glomerular filtration rate <30 ml/min/1.73 m <sup>2</sup> according to chronic kidney disease epidemiology collaboration (CKD-EPI) formula                                                                                                                                                                                                                                                                                                                                                                                                                                                               |                         |
|                                                    | BMI (body mass index) >30 kg/m <sup>2</sup>                                                                                                                                                                                                                                                                                                                                                                                                                                                                                                                                                                        |                         |
| <b>Laboratory results</b>                          |                                                                                                                                                                                                                                                                                                                                                                                                                                                                                                                                                                                                                    |                         |
| NLR                                                | indicated as measured upon hospital admission                                                                                                                                                                                                                                                                                                                                                                                                                                                                                                                                                                      |                         |
| PLR                                                | Neutrophil-to-lymphocyte ratio                                                                                                                                                                                                                                                                                                                                                                                                                                                                                                                                                                                     |                         |
| Neutrophil granulocytes                            | Platelet-to-lymphocyte ratio                                                                                                                                                                                                                                                                                                                                                                                                                                                                                                                                                                                       | 10 <sup>9</sup> cells/l |
| Lymphocytes                                        |                                                                                                                                                                                                                                                                                                                                                                                                                                                                                                                                                                                                                    | 10 <sup>9</sup> cells/l |
| Platelets                                          |                                                                                                                                                                                                                                                                                                                                                                                                                                                                                                                                                                                                                    | 10 <sup>9</sup> cells/l |
| CRP                                                | C-reactive protein                                                                                                                                                                                                                                                                                                                                                                                                                                                                                                                                                                                                 | mg/l                    |

|                            |                                                                                                                                                                                                                                                                                                                                                                                                                                                                                                                                                                                                                                                                                                                                                                                                                                                                                                                                                                                                                                                                                                                                                                                                                                                                                               |
|----------------------------|-----------------------------------------------------------------------------------------------------------------------------------------------------------------------------------------------------------------------------------------------------------------------------------------------------------------------------------------------------------------------------------------------------------------------------------------------------------------------------------------------------------------------------------------------------------------------------------------------------------------------------------------------------------------------------------------------------------------------------------------------------------------------------------------------------------------------------------------------------------------------------------------------------------------------------------------------------------------------------------------------------------------------------------------------------------------------------------------------------------------------------------------------------------------------------------------------------------------------------------------------------------------------------------------------|
| <b>Outcomes</b>            | indicated as documented in medical report, worst classification reached during hospital stay                                                                                                                                                                                                                                                                                                                                                                                                                                                                                                                                                                                                                                                                                                                                                                                                                                                                                                                                                                                                                                                                                                                                                                                                  |
| Disease severity           | disease severity classification of COVID-19 according to World Health Organization (WHO) [8]:                                                                                                                                                                                                                                                                                                                                                                                                                                                                                                                                                                                                                                                                                                                                                                                                                                                                                                                                                                                                                                                                                                                                                                                                 |
| - <b>Mild disease:</b>     | <p>uncomplicated illness:</p> <p>Patients with uncomplicated upper respiratory tract viral infection, may have non-specific symptoms such as fever, cough, sore throat, nasal congestion, malaise, headache, muscle pain or malaise. The elderly and immunosuppressed may present with atypical symptoms. These patients do not have any signs of dehydration, sepsis, or shortness of breath.</p>                                                                                                                                                                                                                                                                                                                                                                                                                                                                                                                                                                                                                                                                                                                                                                                                                                                                                            |
| - <b>Moderate disease:</b> | <p>Mild pneumonia</p> <p>Patients with pneumonia and no signs of severe pneumonia. (No need for supplemental oxygen)</p>                                                                                                                                                                                                                                                                                                                                                                                                                                                                                                                                                                                                                                                                                                                                                                                                                                                                                                                                                                                                                                                                                                                                                                      |
| - <b>Severe disease:</b>   | <p>Severe pneumonia</p> <p>Patients with fever or suspected respiratory infection, plus one of the following: respiratory rate &gt;30 breaths/min, severe respiratory distress, or peripheral capillary oxygen saturation (SpO2) &lt;90% on room air.</p>                                                                                                                                                                                                                                                                                                                                                                                                                                                                                                                                                                                                                                                                                                                                                                                                                                                                                                                                                                                                                                     |
| - <b>Critically ill:</b>   | <p>Acute respiratory distress syndrome (ARDS):</p> <p>Onset: new or worsening respiratory symptoms within one week of known clinical insult.</p> <p>Chest imaging (radiograph, (computed tomography (CT) scan) bilateral opacities, not fully explained by effusions, lobar or lung collapse, or nodules.</p> <p>Origin of oedema: respiratory failure not fully explained by cardiac failure or fluid overload.</p> <ul style="list-style-type: none"> <li>- Mild ARDS: <math>200 \text{ mmHg} &lt; \text{partial pressure of oxygen in blood (PaO}_2\text{) / inspired fraction of oxygen (FiO}_2\text{)} \leq 300 \text{ mmHg}</math> (with positive endexpiratory pressure (PEEP) or continuous positive airway pressure (CPAP) <math>\geq 5 \text{ cmH}_2\text{O}</math>,7 or non-ventilated)</li> <li>- Moderate ARDS: <math>100 \text{ mmHg} &lt; \text{PaO}_2\text{/FiO}_2 \leq 200 \text{ mmHg}</math> with PEEP <math>\geq 5 \text{ cmH}_2\text{O}</math>,7 or non-ventilated)</li> <li>- Severe ARDS: <math>\text{PaO}_2\text{/FiO}_2 \leq 100 \text{ mmHg}</math> with PEEP <math>\geq 5 \text{ cmH}_2\text{O}</math>,7 or non-ventilated8)</li> </ul> <p>• When PaO2 was not available, SpO2/FiO2 <math>\leq 315</math> suggests ARDS (including in non-ventilated patients)</p> |
| Unfavorable outcome        | Composite outcome of need for non-invasive ventilation (NIV), mechanical ventilation, extracorporeal membrane oxygenation (ECMO) or death                                                                                                                                                                                                                                                                                                                                                                                                                                                                                                                                                                                                                                                                                                                                                                                                                                                                                                                                                                                                                                                                                                                                                     |
| Death/Mortality            | all-cause in-hospital mortality                                                                                                                                                                                                                                                                                                                                                                                                                                                                                                                                                                                                                                                                                                                                                                                                                                                                                                                                                                                                                                                                                                                                                                                                                                                               |

**Figure S1.** Individual slopes of summary measure analysis (slope of NLR measurement of 244 survivors and 29 non-survivors): red dot showing each slope of survived patient and blue dot of non-survived patient, black dots representing the median slope in each group. Value of median slope is shown below the figure.

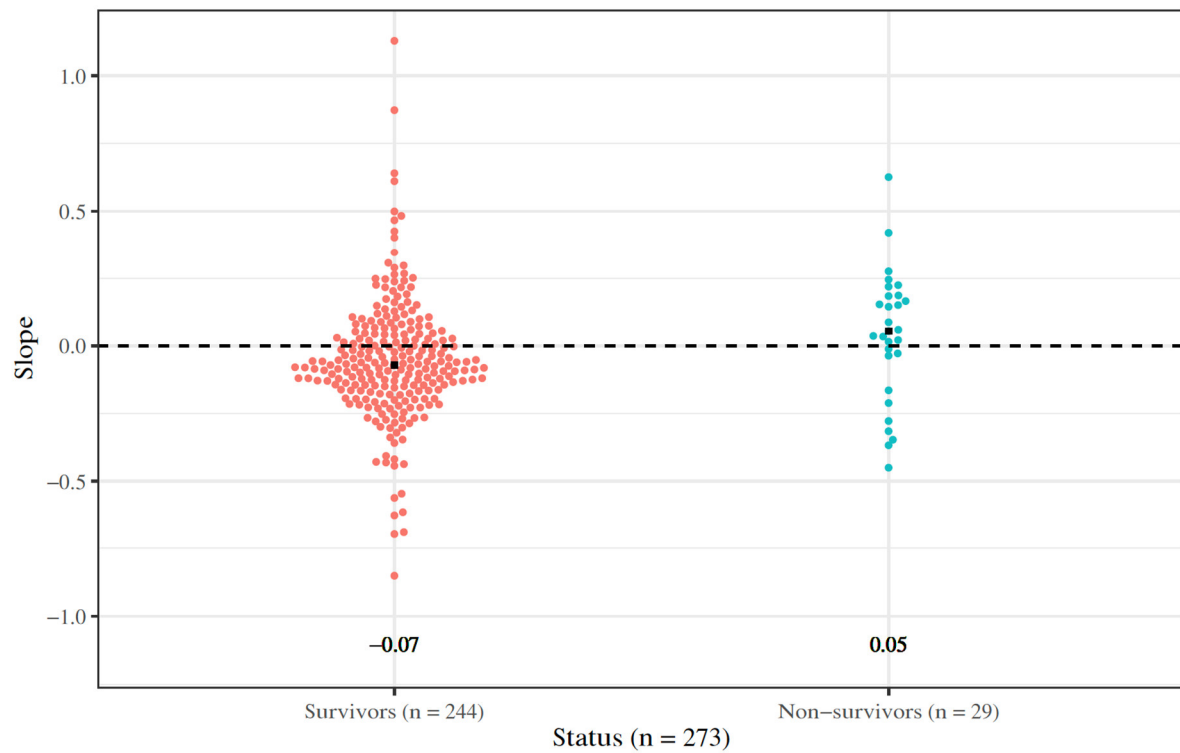

Supplement: s1 [file s1]
